# Supplementary material for: A registry based analysis of the patient reported outcome after surgery for trapeziometacarpal joint osteoarthritis
Source: BMC Musculoskelet Disord. 2020 Feb 1;21:63. doi: 10.1186/s12891-020-3045-7 (PMC6995059; doi:10.1186/s12891-020-3045-7)
Supplement: Supplementary file 1 — Additional file 1. HQ-8 questionnaire. [file 12891_2020_3045_MOESM1_ESM.pdf]

|  |  |  |  |  |  |  |  |   |  |  |  |  |
|--|--|--|--|--|--|--|--|---|--|--|--|--|
|  |  |  |  |  |  |  |  | - |  |  |  |  |
|--|--|--|--|--|--|--|--|---|--|--|--|--|

## Patient questionnaire HQ-8 (arm/hand)

□ □ □ □ - □ □ - □ □

I am (please indicate your writing hand): ☐ Left handed ☐ Right handed ☐ Ambidextrous

Arm/hand that was operated on: ☐ Left ☐ Right

This questionnaire reports on problems that you have had this past week in the hand/arm that was operated on. Please tick the alternative that best corresponds to any of your problems.

### 1. Pain on load

No problems      0      10      20      30      40      50      60      70      80      90      100      Worst problems imaginable

## 2. Pain on motion without load

No problems 0 10 20 30 40 50 60 70 80 90 100 Worst problems imaginable

### 3. Pain at rest

No problems 0 10 20 30 40 50 60 70 80 90 100 Worst problems imaginable

#### 4. Stiffness

No problems      0      10      20      30      40      50      60      70      80      90      100      Worst problems imaginable

## 5. Weakness

No problems      0      10      20      30      40      50      60      70      80      90      100      Worst problems imaginable

## 6. Numbness / tingling in fingers

No problems      0      10      20      30      40      50      60      70      80      90      100      Worst problems imaginable

## 7. Cold Sensitivity (discomfort on exposure to cold)

No problems      0      10      20      30      40      50      60      70      80      90      100      Worst problems imaginable

## 8. Ability to perform daily activities

No problems      0      10      20      30      40      50      60      70      80      90      100      Worst problems imaginable
